# Science Podcasts: Analysis of Global Production and Output From 2004 to 2018

Lewis E. MacKenzie†\*

† Department of Chemistry, Durham University, Durham, United Kingdom. DH1 4ED.

**Keywords:** Science Communication, Podcasts, Impact, Quantitative Analysis, Emerging Media.

---

## 1. Summary

Since 2004, podcasts have emerged as a decentralised medium for science communication to the global public. However, to-date, there have been no large-scale quantitative studies of the production and dissemination of science podcasts. This study identified 952 English language science podcasts available between January and February 2018 and analysed online textual and visual data related to the podcasts and classified and noted key production parameters. It was found that the total number of science podcast series available grew linearly between 2004 and 2010, and then exponentially between 2010 and 2018. 65% of science podcast series were hosted by scientists and 77% were targeted to public audiences. Although a wide range of primarily single-subject science podcasts series were noted, 34% of science podcast series were not dedicated to a science subject. Compared to biology and physics, chemistry may be under-represented by science podcasts. Only 24% of science podcast series had any overt financial income. 62% of science podcast series were affiliated to an organisation; producing a greater number of episodes (median = 24, average = 96) than independent science podcast series (median = 16, average = 48). This study provides the first 'snapshot' of how science podcasts are being used to communicate science to public audiences around the globe.

\*Lewis.E.MacKenzie@Durham.ac.uk

†Present address: Department of Chemistry, Durham University, Durham, United Kingdom. DH1 4ED.

## 23 2. Introduction

24 Since 2004, podcasts have emerged as a new decentralised medium for free and independent communication to  
25 global audiences. Podcasts are typically audio-only, hosted online, and distributed to audiences via direct, on-  
26 demand audio and video downloads to personal computers, MP3 players, interactive media devices, and  
27 smartphones.[1] For app-enabled devices, episodes of a podcast series can be automatically downloaded via free  
28 opt-in subscription to particular podcast series ‘feeds’.[2]<sup>a</sup> For audiences, audio podcasts are particularly  
29 convenient because they can be listened-to whilst undertaking other activities without looking at a screen.  
30 Additionally, podcast may be accompanied supplementary ‘show notes’ that can contain text, hyperlinks, and/or  
31 images. For content creators, podcasts are convenient because they can be created with readily-available  
32 equipment, i.e. a microphone, audio recording/editing software, a web hosting service,[6] or even just a single  
33 smartphone.[7] Despite minimal technical requirements, podcasts can also be created with high-end professional  
34 production values, similar to broadcast radio shows.

35 Science podcasts have become a varied and abundant avenue for science communication, with many hundreds  
36 of English language science podcast series currently available to the public, covering many different topics,  
37 audiences, and formats. Due to being unconstrained by the format demands of TV and radio media, many diverse  
38 styles of science podcasts are available, including: monologues, informal chats, professional science news, panel  
39 shows, and comedy.[8] The freedom to incorporate humorous elements (if desired) is particularly notable because  
40 humour has been beneficial for engaging audiences in science communication.[9,10] Crucially, podcasts enable  
41 science communicators to directly engage audiences in a style of their choosing, without the risks of  
42 miscommunication associated with “stage managed” dissemination via traditional print and broadcast media.[11]

43  
44 Due to their online distribution, podcasts have the potential to reach audiences around the globe, in a manner  
45 unconstrained by the demographic or geographic restrictions associated with traditional regional or national  
46 media.[12] This allows some podcasts to cater for niche audiences that are not a priority for traditional media. One  
47 such example of a highly specialised science podcast series is: ‘*This Week in Virology*’, which primarily serves the  
48 virology research community, yet which also reportedly has a large proportion of public listeners.[9] Another  
49 example of podcasts filling an under-served niche are podcasts that focus on science for young children, one  
50 example of which is ‘*Wow In The World*’.[13]. Due to the large number of science podcasts, their accessible nature,  
51 and their varied production, it could be said that “*there is a science podcast for everyone*”.

52  
53 For science communication, the audio-only format of podcasts provides several key advantages over traditional  
54 print and televisual media beyond that of convenience to listener and producer. Merzagora notes that compared  
55 to television and print, audio media is “*more relaxed and reflective*”; that it “*allows the audience to hear the true voice of*  
56 *the protagonist*” (i.e. the science communicator); and that “*the barrier separating the listener from journalists and*  
57 *scientists is less impenetrable*”.[14] Additionally, podcasts creators commonly use websites and social media to

---

<sup>a</sup> Note that the term ‘podcast’ can both refer to a single podcast episode or a series of podcast.

58 receive listener feedback and facilitate discussion. Such “two-way dialogue” – not typically available in traditional  
59 broadcast and print media - can help improve public trust in science”. [15,16] It has been speculated that podcast  
60 audiences may feel more personally connected to the producers of podcasts than of other forms of media. [17]  
61 Additionally, podcasts have been demonstrated to improve scientific information uptake in students, medical  
62 patients, and the public. [18–20] These advantages combine to make podcasts an attractive medium for science  
63 communication for both independent science communicators and larger organisations. Examples of large  
64 organisations with science podcasts include: professional scientific societies, space agencies, funding  
65 agencies/charities, scientific journals, government agencies, schools, and universities.

66 Audience engagement metrics for podcasting are either not well developed or not publicly available. [21]  
67 Therefore, studies of podcast listener demographics have primarily relied on audience surveys. In 2018, a  
68 commercial survey of general podcast audiences in the USA found that both men and women listen to podcasts in  
69 similar proportions (27% and 24% of respondents respectively); that podcast audiences skew towards young  
70 adults; that podcast audiences are well-educated, and that individuals typically listen to an average of 7 podcasts  
71 per week (corresponding to an average of 6 hours 37 minutes). [22] In contrast, a study of science podcast audiences  
72 in Brazil by Dantas-Queiroz et al. [10] found that an overwhelming proportion (87%) of self-reported responders  
73 to a science podcast survey were men; this may reflect wider societal biases influencing differences in how men  
74 and women engage with scientific content online, [10] but the constituent demographics of science podcast  
75 audiences are still unclear.

76  
77 Despite the rise of podcasts as a popular medium for science communication, there have been no studies of the  
78 large-scale patterns in the production of science podcasts; this represents a large and fundamental gap in our  
79 knowledge of science communication. Therefore, this aim of this study was to provide the first large-scale  
80 quantitative insight into the overall global production and dissemination of science podcasts. This has been  
81 achieved by analysing online textual and visual presence of 952 English language science podcasts for key  
82 production variables, including: audio/visual format, topic, target audiences, hosts, number of episodes released,  
83 lifespan of podcasts, supplementary income, and the incorporation of supplementary show notes. All data  
84 associated with this study is available as a supplementary dataset in the form of a Microsoft Excel spreadsheet.

## 86 3. Materials and Methods

### 87 Information Sources

88 All information used in this study was sourced from public websites that were dedicated to the promotion of  
89 podcasts. Information was gleaned exclusively from visual and textual “metadata” relating to each podcast series,  
90 including the description of each podcast series on ‘iTunes’, the websites of podcasts, and the social media content  
91 associated with podcast series, i.e. on ‘Twitter’, [23] ‘Facebook’, [24] and ‘Patreon’. [25]. The audio and video content  
92 of podcasts themselves was not utilized due to the impracticalities associated with listening and transcribing the  
93 tens of thousands of hours of audio content that science podcasts provide. [26] Producers and other individuals

94 associated with the production of podcast series were not contacted for information relating to this study in order  
95 to avoid methodical disparity between podcast series with responsive producers and those without responsive  
96 producers. In all cases, information was accessed between the 5<sup>th</sup> of January 2018 and 5<sup>th</sup> of February 2018. The  
97 associated supplementary database contains all the specific dates of when each website URL was accessed. All  
98 data was manually coded and categorised the author.

99

## 100 Identification of Podcast Series

101 Due to the decentralised nature of the podcast medium, there is not a single podcast database or website that lists  
102 all podcast series. However, the closest thing to a “de-facto” centralised podcast series database is the ‘iTunes’  
103 podcast directory, which as of 2015, was estimated to list over 200,000 podcast series.[27]<sup>b</sup> The ‘iTunes’ podcast  
104 directory’s search function is available cross-platform: i.e. it can be used by podcast apps running on non-Apple  
105 platforms, e.g. Android devices.[28,29] If a podcast series is not listed on the ‘iTunes’ podcast directory, then it is  
106 considerably less likely to be found by listeners.[30] Therefore, in line with other studies,[15] the ‘iTunes’ podcast  
107 directory was selected as the primary directory from which to source podcasts.

108 A systematic review of the ‘iTunes’ podcasts ‘Natural Sciences’ directory was conducted to identify potential  
109 podcast series for inclusion in this study.[31] All podcast series in the ‘Natural Sciences’ section were examined  
110 between the 5<sup>th</sup> of January 2018 and the 5<sup>th</sup> of February 2018 by proceeding through the section in reverse  
111 alphabetical order. However, it should be noted that the category a podcast series is assigned to within the ‘iTunes’  
112 podcast directory is based entirely on the category nominated by the uploader of said podcast series [30]:  
113 consequently, there are many non-scientific podcast series spuriously listed in the ‘Natural Sciences’ ‘iTunes’  
114 category.[31] Therefore, to ensure that only valid podcast series covering scientific topics were examined in this  
115 study, a stringent set of inclusion criteria were developed and applied (see sub-section ‘Categorical Definitions’).  
116 The inclusion criteria were applied after analysis of the textual and visual information associated with each podcast  
117 series and are defined in the sub-section ‘Inclusion/Exclusion Criteria’. Additionally, during the study, some  
118 podcast series were found that were not listed on the ‘iTunes’ podcast directory. These were also considered for  
119 inclusion. Of these ‘non-iTunes’ listed podcasts, 18 met the inclusion criteria, representing ~2% of the 952 science  
120 podcast series included in this study.

## 121 Inclusion/Exclusion Criteria

122 To ensure that only legitimate science podcast series were included in this study, the following set of  
123 inclusion/exclusion criteria were developed and applied:

- 124 • Only English language podcast series were included in this study. If a podcast series was  
125 available in multiple languages, then only the English language podcast feed was analysed to  
126 avoid duplicating content.

---

<sup>b</sup> ‘iTunes’ may also be referred to elsewhere as ‘Apple Podcasts’.[79]

- 127 • For the purposes of this study, “science podcasts” are primarily defined as podcast series  
128 covering topics in the natural sciences, i.e. physics, chemistry, biosciences, geology,  
129 oceanography, climate change, palaeontology, and mathematics. *Nb: this definition is functionally*  
130 *similar to that used by Birch and Weitkamp (2010).[15]*
- 131 • Under a secondary definition: podcast series covering the academic and research aspects of  
132 computer science, engineering, pharmacology and medicine were included. These podcast series  
133 account for 3% of the podcasts included in the study.
- 134 • Podcast series focusing on non-science topics were excluded. *Nb: examples of such topics include:*  
135 *consumer technology; business; gardening; bird-watching (“birding”); food/cooking; religion; life-*  
136 *coaching; weather; sustainability; environmental activism; pseudo-science; occult and paranormal; nerd*  
137 *culture, and podcasts primarily intended to review or sell commercial products, e.g. relating to tropical fish*  
138 *keeping or telescopes.*
- 139 • If the scientific nature of a podcast series was unclear, then that podcast series was excluded.
- 140 • If a podcast series was available as separate audio-only and video feeds covering the otherwise  
141 identical content, then only the video-feed was included for analysis to avoid data duplication.
- 142 • Podcast series with no episodes available to stream or download via either ‘iTunes’ or another  
143 website were excluded.
- 144 • To be included for analysis, episodes of a podcast series had to be freely available for listeners to  
145 stream or download from a source at the time of sampling. *For example, if a podcast had 100 episodes*  
146 *available on ‘iTunes’, yet had 250 episodes available to stream on their own website, then 250 episodes were*  
147 *noted.*
- 148 • If the content of a podcast series was originally available prior to 2004, (e.g. as an internet or  
149 broadcast radio show), then the original broadcast date of the first show episode was used in-lieu  
150 of the upload date of the podcast episode. *Nb: this was used because it provides some context for long-*  
151 *running internet radio series that have embraced the podcast format. However, this has some consequences*  
152 *for interpreting the results of this study: see the “Methodology and associated limitations” sub-section for*  
153 *more details.*

154

## 155 Categorical Definitions

156 Podcast series, their production methods, and their production outputs were manually classified by the author in  
157 accordance with the definitions provided in Table 2 and the methods detailed herein.

158 Science podcast series were typically found to be focused on either a single distinct topic or to cover many  
159 different topics across a wide range of scientific disciplines. Therefore, an exclusive single-category system was  
160 used to classify the topics of podcast series; i.e. podcast series were either classified as a single subject, or if they  
161 covered many topics, they were classified as ‘general science’. Similarly, an exclusive one-category classification  
162 system was deemed sufficient for organisational affiliations, target audiences, and whether or not a podcast series  
163 was video or audio format. Three non-exclusive categories were devised for classifying supplementary income:

164 'donations', 'merchandise', and 'advertising/sponsorship'. These categories were not exclusive as individual podcast  
165 series may employ some or all of these income mechanisms.

166 'Country of podcast production' was defined as the country primarily associated with a podcast series and its  
167 hosts. For this category an exclusive, exclusive one-category classification system was adopted; if two or more  
168 countries were associated with a podcast series, then it was classed as 'multinational'.

169 Science podcast hosts were classified according to a ranked classification system consisting of: 'Scientific  
170 Researchers/Educators' (Rank 5); 'Media/Journalism Professionals' (Rank 4); (3) 'Other Professionals' (Rank 3); 'Amateurs'  
171 (Rank 2); and 'unclear' (Rank 1), where the ranking is related to general expertise/scientific authority, i.e. the higher  
172 the rank the higher the authority (see Table 2). In the case where podcasts had multiple hosts (or a single host of  
173 different areas of expertise) then the highest ranked category corresponding to one of the hosts was recorded, even  
174 if that host was in an overall minority of hosts. The limitations of this method are discussed in the 'Methodology  
175 and associated limitations' sub-section of the discussion.

176 Podcast activity and podcast lifespans were determined by the objective definitions described in Table 2.

## 177 Data analysis

178 All relevant information and resultant categorical analysis was recorded within a spreadsheet database (Microsoft  
179 Excel 2016, .xlsx format), which is available as a supplementary dataset to this manuscript. Basic categorical  
180 analysis was undertaken with Microsoft Excel, however, advanced categorical and data analysis (such as analysis  
181 of podcast series lifespan) was carried out using custom-written MATLAB scripts (MATLAB 2017b/ 2018a,  
182 Mathworks). Figures were created from data by plotting in MATLAB with some minor annotations added in  
183 PowerPoint (Microsoft PowerPoint 2016).

184 To estimate mean lifespan of podcast series, single-term and two-term exponential decays were fitted to podcast  
185 series lifespan data by least-squares regression.<sup>c</sup> The equations describing these fits are respectively:

$$y = ae^{bx}, \quad \text{Equation 1}$$

$$y = ae^{bx} + ce^{dx}. \quad \text{Equation 2}$$

186

187 Where  $a$ ,  $b$ ,  $c$ , and  $d$ , are the recovered best-fit parameters with associated 95% confidence intervals. The mean  
188 lifespan ( $\tau$ ) was then calculated by:

$$T = -\ln(2) / b. \quad \text{Equation 3}$$

189

190 Where  $\ln(2)$  is the natural logarithm of 2 (approximately 0.693). For estimation of long and short mean lifespans  
191 components from two-term exponential decay fits,  $d$  was substituted for  $b$  in Equation 3. 95% confidence intervals  
192 for the upper and lower bounds of  $T$  were also estimated. The statistical significance of the difference between the  
193 best-fit estimates of  $T$  for long duration and short duration components were estimated by the method described in

---

<sup>c</sup> Two-term exponential fits were necessary because single-term exponential decays were found to fit the data poorly, as shown in Figure 8.

194 Bland and Altman (2011), which is based upon the 95% confidence intervals.[32] In all cases (including the case of  
195 non-normally distributed 95% confidence intervals), the larger confidence interval was used to assess statistical  
196 significance.

197 The statistical significance of the difference in the number of episodes produced by 'affiliated' and 'independent'  
198 podcast series was calculated via a two-sample t-test.[33]

199

## 200 4. Results

201 952 science podcast series met the inclusion criteria for this study. A similar number - i.e. many hundreds of  
202 podcast series - were excluded as per the inclusion/exclusion criteria, but the details of these individual excluded  
203 podcasts were not recorded.

204 Between 2004 and 2010, the total number of science podcast series grew in a linear manner (see linear fit in  
205 Figure 1A,  $R^2 = 0.99$ ). In contrast, between 2010 and 2018 the total number of available science podcast series grew  
206 exponentially (see Figure 1A,  $R^2 = 0.99$ ), rising to 952 podcast series by the sampling period (5<sup>th</sup> January – 5<sup>th</sup>  
207 February 2018). Before 2004, 11 science podcasts were available as internet radio shows which have subsequently  
208 been made available as science podcast series.

209 As of their individual sampling dates,<sup>d</sup> 46% of total science podcast series were 'active', meaning that they  
210 released an episode in the three months prior to their specific sampling date. Of the remaining 'inactive' podcast  
211 series, 14% released an episode between three to twelve months prior their sampling date, and 40% had not  
212 released an episode for over a year prior to their sampling date (see Figure 1B).

213 The number of episodes released by each science podcast series was found to be highly variable: 33% of science  
214 podcast series produced fewer than 10 episodes, and 72% of science podcast series produced fewer than 50  
215 episodes (see Figure 1C and Table 1). From Figure 1D, it is apparent that a high proportion of science podcast series  
216 (almost 40%) did not produce podcast episodes for more than a year.

217 A wide variety of science podcast series topics/themes were recorded, with 66% of science podcast series themed  
218 around discipline-specific topics (see Figure 2A). Of particular note, 'Chemistry' was the topic for only 3% of science  
219 podcast series, compared to 18% for 'Physics and Astronomy', and 14% for 'Biology'. 34% of science podcast series  
220 were categorised as 'General Science', i.e. science podcasts focusing on no single discipline-specific theme.

221 The majority of science podcast series (77%) have been targeted to public audiences, 16% were targeted towards  
222 scientists or specialists, and 6% were provided as academic lectures, research seminars/conferences, or as  
223 secondary education learning aids (see Figure 2B).

---

<sup>d</sup> The exact sampling date for each podcast is provided in the associated supplementary dataset.



224 Nearly 2/3<sup>rd</sup>s (65%) of science podcast series were hosted by '*scientists*'; 10% were hosted by '*media professionals*',  
225 7% by '*other professionals*', and 5% by '*amateurs*' (see Figure 3A). Host categories could not be identified for 13% of  
226 science podcast series.

227 38% of science podcast series were produced independently, and 62% were produced with some explicitly  
228 acknowledged affiliation to an organisation (see Figure 3B). '*Professional Organisations*' produced 17% of science  
229 podcasts; '*Universities*' 14%; '*Conventional Media Networks*' 13%; '*Other Research Bodies*' 6%; '*Podcast Networks*' 5%;  
230 '*Scientific Journals*' 3%, and '*Amateur Organisations*' 2%. How podcast affiliation, or lack thereof, affects various  
231 science podcast production outputs is explored further, later in this manuscript.<sup>e</sup>

232 57% of science podcast series did not follow a regular episode release schedule (see Figure 3C). The most popular  
233 release schedule was '*Weekly*' (15%), followed by '*Monthly*' (8%), and '*Fortnightly*' (6%). Only 3% of science podcasts  
234 released more than one episode per week, and 1% released an episode daily. Only 2% of science podcast series  
235 explicitly acknowledged a seasonal release format, i.e. periods of scheduled episode releases followed by an  
236 extended period where no episodes are released.

237 Whilst podcasts can contain both audio and visual information, 87% of science podcast series were audio-only,  
238 with the remaining 13% being video podcast series (so-called "*vodcasts*") (see Figure 4A). 51% of science podcast  
239 series provided additional non-audio supplementary material in the form of show notes (e.g. hyperlinks, images,  
240 references, etc.) (see Figure 4B). From Figure 4C, it is clear that the proportion of new video science podcast series  
241 produced each year, as a fraction of overall science podcast series, has declined from a peak of ~30% of science  
242 podcast series in 2007 to ~5% of science podcast series in 2017. However, the absolute number of new video science  
243 podcast series produced each year has been relatively constant, at around  $9 \pm 3$  (mean  $\pm$  standard deviation). This  
244 long-term decline in video podcasts may reflect changing behaviour, i.e. that audiences consume podcasts whilst  
245 undertaking activities incompatible with watching video content.[3–5,22]

246 Global production of science podcast series to date is shown in Figure 5: 57% of the available English language  
247 science podcast series were produced in the United States of America (USA); 17% were produced in the United  
248 Kingdom (UK); 5% in Australia; 3% in Canada, and 1% in the Republic of Ireland. Other countries produce a  
249 combined total of 7% of English language science podcast series. A country of production could not be identified  
250 for 10% of science podcast series.

251 76% of science podcast series were observed to have no overt supplementary income mechanisms and are thus  
252 seemingly independently financed by their producers (see Figure 6A). '*Advertising*' was the least commonly  
253 utilised supplementary income mechanism (see Figure 6B), but it was common for science podcasts to mix  
254 '*Voluntary Donations*', '*Merchandise*', and '*Advertising*' to various degrees.

255

256 The differences between '*independent*' science podcast series and '*affiliated*' science podcast series in relation to  
257 various production outputs is shown in Figure 7. In terms of podcast activity, there is only a marginal difference

---

<sup>e</sup> See Figure 7 and Figure 8



258 between the percentage of active '*affiliated*' and '*independent*' science podcast series (48% and 45% respectively) (see  
259 Figure 7A). However, a larger proportion of '*independent*' podcast series (84%) are targeted to the public, compared  
260 to '*affiliated*' podcast series (73%) (see Figure 7B). A slightly smaller proportion of '*independent*' podcast series (14%)  
261 are targeted towards '*scientist/specialist*' audiences compared with '*affiliated*' podcast series (17%) (see Figure 7B).  
262 Nearly all science podcast series billed as academic seminars, student lectures, or secondary education aids are  
263 produced as '*affiliated*' podcast series (see Figure 7B). Roughly 75% of both '*independent*' and '*affiliated*' podcast  
264 series had no overt supplementary income (see Figure 7C). However, a considerably greater proportion of  
265 '*independent*' podcast series solicited for '*voluntary donations*' and sold '*merchandise*' (see Figure 7C). '*Advertising*'  
266 was much more prevalent for '*affiliated*' podcast series (25%) than '*independent*' podcast series (11%) (see Figure  
267 7C); this is likely due to many '*affiliated*' podcast series being associated with commercial broadcast networks,  
268 where '*advertising*' was assumed.

269

270 '*Affiliated*' podcast series produced a greater number of podcast episodes (median = 24, average = 90), than  
271 '*independent*' podcast series (median = 16, average = 48). A two-tailed t-test found that the difference between in the  
272 overall number of episodes released was statistically significant ( $p = 0.01$ ) and that the greater average number of  
273 podcast episodes released by '*affiliated*' podcast series was also statistically significant ( $p < 0.01$ )

274 The lifespan of both '*independent*' and '*affiliated*' podcast groupings was best-fitted by a two-term exponential.  
275 This indicates that both '*affiliated*' and '*independent*' podcast groupings contain subsets of '*short lifespan*' and '*long*  
276 *lifespan*' podcast series (see Figure 8A and Figure 8B). Extraction of fit parameters enables the estimation the podcast  
277 '*mean lifespan*' ( $\tau$ ) for each of these podcast subsets.  $T$  is analogous to the concept of '*mean lifespan*' in radioactive  
278 decay; i.e.  $T$  is the elapsed time span in which, 50% of the podcasts in a population become inactive. The best-fit  
279 and 95% confidence interval values for  $T$  are shown in Figure 8C and Figure 8D. For short-duration podcast series  
280 subsets, the difference in the best-estimates of  $T$  for '*affiliated*' and '*independent*' podcast series was not statically  
281 significant ( $p > 0.33$ ). However, for long-duration podcast series subsets, the difference in the best-estimates of  $T$  or  
282 '*affiliated*' and '*independent*' podcast series (5.5 years, and 4.3 years respectively) was statistically significant ( $p <$   
283 0.02).

## 284 5. Discussion

### 285 Methodology and associated limitations

286 This is the first study to analyse the global production and outputs of a large group of science podcast series. As  
287 such, the findings here provide fundamental and novel insight into who is producing science podcast series and  
288 their target audiences. However, before detailed discussion of results, it is important to acknowledge the  
289 limitations of the methodology employed in this study.

290 Firstly, in this study, only English language science podcast series were surveyed and analysed. It is highly  
291 probable that non-English language science podcast series would demonstrate different trends due to different  
292 listener and producer demographics.

293 Secondly, it is important to note that the data generated in this study was analysed (coded) by only a single  
294 researcher (the author). This is a shortcoming of the study design because different individuals may categorize  
295 qualitative data differently. Best practice in such research would have been to follow “multiple coding” procedures,  
296 i.e. for multiple researchers to evaluate and analyse the data, subsequently resolving any discrepancies arising,  
297 whilst also maximising robustness in data coding.[34] Also relevant to data coding and interpretation of the results  
298 is that a host classification based on a notional ranking of scientific authority was used. The rationale of this system  
299 was that having even a single scientist in a podcast host group will tend to elevate the scientific content of a podcast,  
300 therefore such instances should be highlighted. However, this host classification system has several limitations: (1)  
301 it is based on analysis of textual and visual data, (2) it may overly-simplify the data in a manner that over-represents  
302 higher-ranked host classifications (i.e. scientists and media professionals), and (3) it doesn’t consider the expertise  
303 of guests on podcasts. For future studies, a classification system that better represents the myriad possibilities of  
304 podcast host backgrounds should be implemented.

305 Thirdly, science podcast series were primarily identified by survey of only a single ‘iTunes’ category: i.e. the  
306 ‘Natural Sciences’ category.[31] This is similar to the methodology of a previous study by Birch and Weitkamp,  
307 which defined science podcasts as “the natural sciences and mathematics”. [15] However, constraining this study to  
308 the ‘Natural Sciences’ category limits the podcasts examined for two reasons: (1) listing a podcast on ‘iTunes’ is not  
309 mandatory; (2) the category a podcast is listed on ‘iTunes’ is self-selected by the uploader, and therefore, many  
310 science podcasts may have been listed in ‘iTunes’ categories not examined. The most obvious category that wasn’t  
311 analysed was the ‘Science and Medicine’ category.[35] However, a large number of podcast series that covered  
312 dubious/harmful pseudo-medical practices and advice were prevalent within the ‘Science and Medicine’ category.  
313 Therefore, an extremely stringent and in-depth inclusion/exclusion criteria strategy would have to be developed  
314 and applied, along with deep content analysis (e.g. actually listening to individual episodes of each podcast), to  
315 ensure that only legitimate scientific podcast series are included in any such study. Unfortunately, this was beyond  
316 the scope of the current study. Moreover, some science podcast series are not listed on ‘iTunes’ at all; an example  
317 of such a science podcast is ‘BioLogic Podcast’, which is hosted on the video sharing website ‘YouTube’.[36]  
318 Additionally, it should be noted that some podcast series may voluntarily restrict the number of podcast episodes  
319 that are freely available to the public via ‘iTunes’ or other websites, but only freely-available episodes were included  
320 for analysis within this study. Therefore, this study provides a *lower-bound* on the number of science podcast series  
321 available during the sampling period.

322 Fourthly, this study exclusively examined the visual and textual online presence of podcast series. Due to  
323 practical constraints, it was not possible to examine the extensive audio data associated with science podcasts.  
324 Therefore, it is possible that various aspects of podcast production were not fully categorised. This could affect all  
325 studied podcast categories, but most likely affects the capture of any audio-only advertisements or sponsorships  
326 that were not acknowledged in textual or visual web content of science podcasts. Therefore, it is possible that a  
327 greater proportion of science podcasts contain advertisements or sponsorships than is explicitly reported by this  
328 study. With regards to hosts, it is possible that podcasts hosts and production teams fit multiple categories, but  
329 this is not captured by the relatively shallow nature of our study; as Picardo and Regina (2008)[8] note in their

330 detailed comment on podcasting: “defining who is inside and who is outside [sic: the podcast] control room is not  
331 an easy task”.

332 Fifthly, podcast episode length data and podcast download statistics were not available for analysis. Such data  
333 would be desirable for a more complete analysis of analysis of the consumption and production of science  
334 podcasts.

335 A notable limitation of this study is that the original podcast upload date for radio shows broadcast pre-2004  
336 are not known; instead the original air-date episodes (as provided on iTunes or another relevant website) is used  
337 as a compromise. This accounts for the 11 podcast series available prior to 2004 (see supplementary database for  
338 full details). Of these 11 podcast series, 10 are affiliated to an organisation. Considering that 586 ‘*affiliated*’ podcast  
339 series were analysed and that the mean lifespan,  $T$ , is calculated from robust curve-fitting models, the influence of  
340 these 10 podcast series on the results of lifespan fitting calculations can be considered negligible for the purposes  
341 of this study.

## 342 Science podcasts vs. general podcasts

343 Large-scale studies of podcast production have not been published in peer-reviewed literature, therefore it is  
344 necessary to look beyond the peer-reviewed literature to glean large-scale podcast production insights. In 2015,  
345 Morgan published a semi-formal study of podcasts of many different topics as a blog post on ‘*medium.com*’.[27]  
346 Whilst not published in a peer-reviewed journal, all data associated with Morgan’s study is publicly available.  
347 Morgan’s study sampled a subset of podcast series available on ‘*iTunes*’ in June 2015. Morgan estimated that there  
348 were 206,000 unique podcast series available on ‘*iTunes*’ at that time. Morgan then selected a random subset of  
349 podcast series for further analysis. This subset consisted of a total of 2500 podcast series, with 100 random podcast  
350 series drawn from the 25 “most popular” ‘*iTunes*’ categories (N.B. this did not include any category theme around  
351 science). Morgan’s sampling and analysis was fully-automated, so manual categorisation of podcast production  
352 outputs was not conducted. Importantly, Morgan defined “*active podcast series*” as podcast series that had released  
353 an episode within the 6 months prior to the sampling date [27]; this is a less stringent definition than that used in  
354 the present study, which defines “*active podcast series*” as podcast series that had released an episode within 3  
355 months prior to the sampling date. Morgan found that the number of podcast series available on ‘*iTunes*’ had  
356 grown from ~10,000 in 2007 to ~206,000 in 2015. When graphed, the trends in growth of total number of podcast  
357 series calculated by Morgan (not shown here) appear broadly similar to the trends shown in Figure 1A, i.e.  
358 displaying distinct linear growth up to 2010, and exponential growth thereafter. This indicates that trends in the  
359 growth of science podcast series likely reflects the overall growth of the podcast medium. Additionally, Morgan  
360 found that roughly 40% of podcast series were ‘*active*’ by his less stringent definition.[27] This is lower than the  
361 comparable population of ‘*active*’ science podcast series (46%) found by the present study (see Figure 1B). This  
362 comparison suggests that science podcast series may be more inclined to continue to release episodes compared to  
363 the wider population of podcast series. However, this comparison may not necessarily be valid because Morgan  
364 did not exclude podcast series that had not released a single episode. Further, Morgan found that the average  
365 lifespan of podcast series was around 6 months, and that podcasts, on average, released 12 episodes, at a rate of 2

366 episodes per month. Additionally, Morgan estimated that around 20% of podcast series listed on 'iTunes' at the  
367 time were not English language podcasts.

### 368 Insights into the production of science podcasts

369 The predominance of scientists as hosts for science podcast series (see Figure 3A), combined with fact that most  
370 science podcast series (57%) are released on an irregular schedule (see Figure 3C), may indicate that a significant  
371 majority of science podcast series are being produced by scientists as an extra commitment beyond their regular  
372 duties as a scientific researcher, science educator, or science communicator. However, the limitations of the study  
373 methodology must be considered in that this study may possibly over-represent scientists as podcast hosts (see the  
374 Discussion sub-section 'Methodology and Associated Limitations'). The result that most science podcasts do not  
375 have any overt supplementary income mechanisms (see Figure 5A) is of note when considering that there can be  
376 substantial costs associated with hosting a podcast (i.e. high-quality audio equipment and editing software, as well  
377 as branded websites for advertisement and podcast hosting). The lack of overt supplementary income mechanisms  
378 suggests that independent science podcast hosts are paying these costs "out of their own pocket". These results  
379 combine to give a broad impression that many science podcast series are being produced by scientists with no  
380 financial recompense. The obvious exception being the science podcast series 'affiliated' to organisations that can  
381 provide undisclosed financial support. However, the fundamental validity of this interpretation requires further  
382 research and study before firm conclusions can be made.

383 Figure 2A shows that only 3% of science podcast series cover 'chemistry' as their main topic. When compared to  
384 the two other primary science subjects typically taught in schools - i.e. 'biology' (13% of science podcast series), and  
385 'physics and astronomy' (18% of science podcasts) – it appears that chemistry is under-represented in science  
386 podcasts. There are several potential explanations as to why this may be. A 2011 editorial in the journal 'Nature  
387 Chemistry' suggested that chemistry "is a central science", meaning that aspects of chemistry are incorporated into  
388 other disciplines (e.g. biochemistry and materials research); therefore chemistry is often not distinctly represented  
389 in public-facing science communication.[37] Similarly, Hartings and Fahly (2011) noted that popular science  
390 involving chemistry may not be labelled as chemistry; that chemistry is complex; and that chemistry lacks unifying  
391 themes and public narratives that may be present in biology and physics.[38] Additionally, a review of chemistry  
392 communication in 2016 noted that concepts in chemistry are well-served by dynamic visual representations,[39]  
393 therefore chemistry may not be well-suited to the primarily-audio format of podcasts. Indeed, chemistry content  
394 is very well received in more visual internet mediums, e.g. the video series: 'Periodic Videos' on 'YouTube'.[40]  
395 Velden and Lagoze (2009) note that chemistry has been slow to adopt "new web-based models of scholarly  
396 communication" when compared to physics and biology.[41] Whilst this may true for scholarly communications,  
397 it is not clear if this is true for chemistry and digital science communication practices. All these reasons are likely  
398 to play into the apparent lack of chemistry science podcast series. This reinforces a 2016 recommendation from the  
399 'National Academies of Science, Engineering, and Medicine', that science funding agencies should support digital media  
400 for chemistry communication as a priority.[42]

401 The statistically significant greater best-estimate values for mean lifespan of ‘*affiliated*’ podcast series (5.5 years)  
402 compared to ‘*independent*’ podcast series (4.3 years) (see Figure 8D) could be explained by the hypothesis is that  
403 ‘*independent*’ podcast series may be more likely to be produced by individuals or small groups, with limited time  
404 and resources, whereas ‘*affiliated*’ podcast series are produced by organisations with dedicated staff with defined  
405 duties. Such dedicated staff could take-over podcasting duties when necessary, therefore extending the overall  
406 lifespan of the ‘*affiliated*’ podcast series compared to ‘*independent*’ podcast series. However, no firm conclusions  
407 with regards to the causes of podcast series sustainability can be drawn from this study, and it should be noted  
408 that there are exceptionally long-running podcast series within both the ‘*independent*’ and ‘*affiliated*’ subsets. In their  
409 2011 study titled “*Why podcasters keep going*”, Markman found that creator-audience community, engagement (e.g.  
410 via emails, discussion forums, social media etc), audience appreciation, and enjoyment were key drivers of podcast  
411 longevity. Markman notes that further study is required into the phenomena of podcast longevity and so-called  
412 “*podfading*”, where podcasts are no longer produced.[43]

### 413 Open questions and future directions

414 This study provides the first large-scale overview of the production of English language science podcast series, yet  
415 there are many open questions that remain. For example, does the general content of science podcasts differ across  
416 different cultures and languages?[10] What level of prior knowledge is required to understand science  
417 podcasts?[44] Are science podcasts helping to change non-representative stereotypes of scientists?[45] Do science  
418 podcasts promote and foster trust in science?[16] Are podcasts considered in long-term science communication  
419 and impact strategies?[46]

420 The motivations for podcast hosts and creators for podcast have previously been explored in two studies:  
421 Markmann (2011)[43], and Markman and Sawyer (2014).[17] However, the motivations for the creation of science  
422 podcast series may be rather different from the motivations of podcast producers for other topics. For example,  
423 how do factors such as career recognition (or lack thereof), and time constraints motivate science podcasters,[47]  
424 and how do podcast creators use social media to engage with their audiences?[48]

425  
426 In recent years, new methods of analysis have been developed for other new online media such as blogs and  
427 online news sources.[44,49] Whilst metrics such as listener numbers and attention are not available for large-scale  
428 analysis of podcasts, other techniques could be adapted to the study of science podcasts. For example, analysis of  
429 hyperlinks included in blogs has been used to provide a measure of “content diversity”.[49] Similarly, hyperlink  
430 analysis could be applied to science podcast show notes to ascertain diversity of sources and content that audiences  
431 are referred to.

432 Audiobooks are an increasingly popular medium [50] that could be used as a direct comparison between the  
433 written word and audio forms of science communication. Audiobooks, like podcasts, are a portable and convenient  
434 audio-only format. Audiobooks are typically narrated by a single voice-actor or by the author themselves.  
435 However, because they are typically direct adaptations of the written word, science audiobooks are formal, not  
436 conversational.[51] A further distinction of audiobooks from podcasts is that audiobooks are nearly exclusively

437 produced by for-profit media and publishing companies, not independent, decentralised, content creators. As an  
438 example of the potential richness of audiobooks as a data source: at the time of writing, ‘Audible’, (a major for-profit  
439 audiobook content provider), has over 2000 science audiobooks available across ‘science’, ‘astronomy’, ‘physics’, and  
440 ‘biology’ categories.[52] Therefore, audiobooks could serve as a “test-bed” for studies comparing how media formats  
441 may alter the effectiveness of science communication.

## 442 6. Conclusions

443 This study has revealed large-scale trends in science podcasting for the first time. Overall, the total number of  
444 science podcast series grew linearly between 2004 and 2010, and subsequently it has grown exponentially between  
445 2010 and 2018. A total of 952 science podcast series met the inclusion criteria for this study, giving a lower-bound  
446 on English language science podcasts available at the start of 2018. Most science podcast series (87%) are audio-  
447 only, with the number of new video-format science podcast series declining from a peak of ~30% in 2007 to only  
448 5% in 2017. This may reflect that podcast audiences are choosing to listen to podcasts whilst undertaking activities  
449 incompatible with consuming video content.

450 One third of science podcast series were found to cover many aspects of science, but many individual subjects  
451 were well represented by dedicated podcast series. Notably, ‘chemistry’ as a topic appears to be under-represented,  
452 with only 3% of podcast series compared to 18% for ‘physics and astronomy’, and 13% for ‘biology. This apparent  
453 under-representation in podcasting may mirror similar long-term trends in science communication where  
454 chemistry has been under-represented as a distinct subject. This may also reflect the idea that chemistry is best-  
455 represented by visual mediums, i.e. not audio podcasts.

456 Most science podcasts appear to be targeted towards the audience of the general public (77%), with fewer  
457 science podcast series serving educational purposes (6%), serving specialist audiences (16%), or dedicated to  
458 science communication for children (< 1%). 51% of science podcast series included extra information to audiences  
459 in the form of supplementary show notes, containing text, images, or hyperlinks.

460 Almost 2/3rds of science podcast series have at least one host with a background in scientific research, science  
461 communication, or science education. This indicates that scientists are using podcasts to communicate with the  
462 public. The exact reasons as to why podcasting is attractive to science communicators are still to be ascertained,  
463 but it is likely to be due to the simplicity of producing podcasts, the low amount of equipment required, the global  
464 audience reach, the ability to receive feedback via social media, the intimate nature of the medium, and the lack of  
465 format constraints.

466 38% of science podcast series appeared to be produced independently; the remaining 62% of science podcast  
467 series had an overt affiliation to some sort of organisation, e.g. a university, funding agency, or media network.  
468 Generally, most science podcast series appeared to not have any overt form of supplementary income, i.e. through  
469 advertising, selling merchandise, or soliciting for audience donations. This indicates that a large portion of science  
470 podcast series are being financed by independent content creators or by organisations. Of podcasts with overt  
471 supplementary income, podcasts ‘affiliated’ with an organisation were more likely to have adverts, and ‘independent’



472 science podcast series were more likely to sell merchandise or solicit for audience donations. Whether or not a  
473 science podcast series is independent or affiliated to an organisation appears to make key differences in several  
474 production outputs. Most notably, '*independent*' podcast series produce fewer episodes on average (median 16,  
475 average 48) than '*affiliated*' podcast series (median 24, average 90) [ $p \leq 0.01$ ]. Furthermore, the long-term mean-  
476 lifespan of '*independent*' podcasts (4.3 years) appears to be significantly less than the long-term mean-lifespan of  
477 '*affiliated*' podcasts (5.5 years) [ $p < 0.02$ ].

478 Whilst this study has provided the first insights into the large-scale production of science podcasts, there are  
479 still many ongoing questions about how science podcasts are being used to communicate science. Metrics for  
480 download and listener attention were not available for the podcasts studied, but content analysis of show-note  
481 hyperlinks could be used in future as a proxy for content diversity. Audiobooks could serve as a medium for  
482 comparative studies between written and spoken science communication, without the conversational nature of  
483 podcasts. In future, a combination of quantitative and qualitative approaches may be required to yield further  
484 insights into the motivations of science podcasters, why they choose to produce the podcasts that they do, and how  
485 science podcasts are meeting the need for science communication without geographic barriers.



486 **Data Accessibility**

487 Supporting data available on BioRxiv at: <https://doi.org/10.1101/298356>

488

489 **Competing Interests**

490 The author declares no competing interests.

491

492 **Acknowledgements**

493 Thanks to the many science podcast creators who inspired this study. Thanks to C.A. Osnes for proof-reading of  
494 draft manuscripts.

495

496 **Funding Statement**

497 Lewis E. MacKenzie postdoctoral position at Durham University was supported by an Engineering and Physical  
498 Sciences Research Council (EPSRC) grant: EP/P025013/1.

499

## 500 References

- 501 1. Condayan C. 2008 Culture Media. *Nat. Rev. Microbiol.* **6**, 646.
- 502 2. Mark Jansen. 2018 How to Download Podcasts and Listen to Them on Android or iPhone | Digital Trends. *Digit. Trends*.  
503 See <https://www.digitaltrends.com/mobile/how-to-download-podcasts/> (accessed on 24 August 2018).
- 504 3. Skiba DJ. 2006 The 2005 Word of the Year: Podcast. *Nurs. Educ. Perspect.* **27**, 54–55.
- 505 4. Dunn MJ. 2006 Launch of the Proteomics Podcast. *Proteomics* **6**, 5983. (doi:10.1002/pmic.200690133)
- 506 5. Jham BC, Duraes G V, Strassler HE, Sensi LG. 2008 Joining the podcast revolution. *J. Dent. Educ.* **72**, 278–281. (doi:72/3/278  
507 [pii])
- 508 6. 2018 This Week In Virology Episode 500: 'keep virology weird'. See [http://www.microbe.tv/twiv/twiv-500/?utm\\_source=feedburner&utm\\_medium=feed&utm\\_campaign=Feed%3A+twivmp3+%28This+Week+in+Virology+-+MP3+Edition%29](http://www.microbe.tv/twiv/twiv-500/?utm_source=feedburner&utm_medium=feed&utm_campaign=Feed%3A+twivmp3+%28This+Week+in+Virology+-+MP3+Edition%29) (accessed on 1 July 2018).
- 511 7. Anchor FM Inc. In press. Anchor - Make your own podcast - Apps on Google Play. See  
512 <https://play.google.com/store/apps/details?id=fm.anchor.android&hl=en> (accessed on 24 August 2018).
- 513 8. Picardi I, Regina S. 2008 Science via podcast. *J. Sci. Commun.* **7**, 1–4.
- 514 9. Nisbet MC, Scheufele DA. 2009 What's next for science communication? promising directions and lingering distractions.  
515 *Am. J. Bot.* **96**, 1767–1778. (doi:10.3732/ajb.0900041)
- 516 10. Dantas-Queiroz MV, Wentzel LCP, Queiroz LL. 2018 Science communication podcasting in Brazil: The potential and  
517 challenges depicted by two podcasts. *An. Acad. Bras. Cienc.* **90**, 1891–1901. (doi:10.1590/0001-3765201820170431)
- 518 11. Weigold. 2001 Communicating Science: a Review of the Literature. *Sci. Commun.* **23**, 163–193.  
519 (doi:<https://doi.org/10.1177/1075547001023002005>)
- 520 12. Redfern J, Illingworth S, Verran J. 2016 What does the UK public want from academic science communication?  
521 *F1000Research* **5**, 1261. (doi:10.12688/f1000research.8815.1)
- 522 13. NPR. 2018 Wow In The World. *Podcast*. See <https://www.npr.org/podcasts/510321/wow-in-the-world> (accessed on 3  
523 March 2018).
- 524 14. Merzagora M. 2004 Science On Air: the Role of Radio in Science Communication. *J. Sci. Commun.* **3**, 1–6.
- 525 15. Birch H, Weitkamp E. 2010 Podologues: Conversations created by science podcasts. *New Media Soc.* **12**, 889–909.  
526 (doi:10.1177/1461444809356333)
- 527 16. Wynne B. 2006 Public engagement as a means of restoring public trust in science - Hitting the notes, but missing the  
528 music? *Community Genet.* **9**, 211–220. (doi:10.1159/000092659)
- 529 17. Markman KM, Sawyer CE. 2014 Why Pod? Further Explorations of the Motivations for Independent Podcasting. *J. Radio  
530 Audio Media* **21**, 20–35. (doi:10.1080/19376529.2014.891211)
- 531 18. Johnson J, Ross L, Iwanenko W, Schifert J, Sen A. 2012 Are Podcasts Effective at Educating African American Men About  
532 Diabetes? *Am. J. Mens. Health* **6**, 365–367. (doi:10.1177/1557988312444717)
- 533 19. Thoma B *et al.* 2017 The impact of social media promotion with infographics and podcasts on research dissemination  
534 and readership. *Can. J. Emerg. Med.* , 1–7. (doi:10.1017/cem.2017.394)
- 535 20. Prakash SS, Muthuraman N, Anand R. 2017 Short-duration podcasts as a supplementary learning tool: Perceptions of  
536 medical students and impact on assessment performance. *BMC Med. Educ.* **17**, 1–14. (doi:10.1186/s12909-017-1001-5)
- 537 21. Podcast Pingback. In press. Announcing Podcast Pingback. See <https://podping.info/> (accessed on 24 August 2018).
- 538 22. Edison Research. 2018 The Podcast Consumer 2018.
- 539 23. Social Media Platform. 2018 Twitter. See <https://twitter.com/> (accessed on 3 March 2018).
- 540 24. Social Media Platform. 2018 Facebook. See <https://www.facebook.com/> (accessed on 3 March 2018).
- 541 25. Social Media Platform. 2018 Patreon. See <https://www.patreon.com/> (accessed on 3 March 2018).
- 542 26. Bailey J. 2008 First steps in qualitative data analysis: Transcribing. *Fam. Pract.* **25**, 127–131. (doi:10.1093/fampra/cmn003)

- 543 27. Morgan J. 2015 How Podcasts Have Changed in Ten Years: By the Numbers. *Medium.com*. See  
544 <https://medium.com/@monarchjogs/how-podcasts-have-changed-in-ten-years-by-the-numbers-720a6e984e4e>  
545 (accessed on 3 March 2018).
- 546 28. Podcast Media LLC. 2018 Pocket Casts. *Google Play*. See  
547 [https://play.google.com/store/apps/details?id=au.com.shiftyjelly.pocketcasts&hl=en\\_GB](https://play.google.com/store/apps/details?id=au.com.shiftyjelly.pocketcasts&hl=en_GB) (accessed on 21 August 2018).
- 548 29. Xavier Guillemane. 2018 Podcast Addict. *Google Play*. See  
549 [https://play.google.com/store/apps/details?id=com.bambuna.podcastaddict&hl=en\\_GB](https://play.google.com/store/apps/details?id=com.bambuna.podcastaddict&hl=en_GB) (accessed on 21 August 2018).
- 550 30. Squarespace. 2018 Setting up a blog to host your podcast. See <https://support.squarespace.com/hc/en-us/articles/115001990668-Setting-up-a-blog-to-host-your-podcast> (accessed on 3 March 2018).
- 552 31. 2018 iTunes 'Natural Sciences'. See <https://itunes.apple.com/us/genre/podcasts-science-medicine-natural-sciences/id1477?mt=2> (accessed on 3 March 2018).
- 554 32. Altman DG, Bland JM. 2011 How to obtain the P value from a confidence interval. *BMJ* **343**, d2304.  
555 (doi:10.1136/BMJ.D2304)
- 556 33. 2018 Two-sample t-test - MATLAB ttest2. *Mathworks*. See <https://uk.mathworks.com/help/stats/ttest2.html> (accessed on  
557 24 August 2018).
- 558 34. Barbour RS. 2001 Checklists for improving rigour in qualitative research: a case of the tail wagging the dog? *Br. Med. J.*  
559 **322**, 1115. (doi:<https://doi.org/10.1136/bmj.322.7294.1115>)
- 560 35. 2018 iTunes 'Science & Medicine'. See <https://itunes.apple.com/us/genre/podcasts-science-medicine/id1315?mt=2>.
- 561 36. 2018 BioLogic Podcast. *Podcast*. See <https://www.youtube.com/channel/UCO3Mka2Esro-bqVRDQnvmq> (accessed on  
562 3 March 2018).
- 563 37. 2011 Chemistry's year. *Nat. Chem.* **3**, 1–1. (doi:10.1038/nchem.933)
- 564 38. Hartings MR, Fahy D. 2011 Communicating chemistry for public engagement. *Nat. Chem.* **3**, 674–677.  
565 (doi:10.1038/nchem.1094)
- 566 39. National Academies of Sciences Engineering and Medicine. 2016 Evidence-Based Research on Learning and  
567 Communication. In *Effective Chemistry Communication in Informal Environments.*, Washington (DC): National Academies  
568 Press (US).
- 569 40. Haran B, Poliakoff M. 2011 The periodic table of videos. *Science (80-. )*. **332**, 1046–1047. (doi:10.1126/science.1196980)
- 570 41. Velden T, Lagoze C. 2009 Communicating chemistry. *Nat. Chem.* **1**, 673–678. (doi:10.1038/nchem.448)
- 571 42. National Academies of Sciences Engineering and Medicine. 2016 Communicating Chemistry: A Design Framework and  
572 Research Agenda. In *Effective Chemistry Communication in Informal Environments.*, Washington (DC): National  
573 Academies Press (US).
- 574 43. Markman KM. 2011 Doing radio, making friends, and having fun: Exploring the motivations of independent audio  
575 podcasters. *New Media Soc.* **14**, 547–565. (doi:10.1177/1461444811420848)
- 576 44. Ranger M, Bultitude K. 2014 'The kind of mildly curious sort of science interested person like me': Science bloggers'  
577 practices relating to audience recruitment. *Public Underst. Sci.* **25**, 361–378. (doi:10.1177/0963662514555054)
- 578 45. Miller DI, Nolla KM, Eagly AH, Uttal DH. 2018 The Development of Children's Gender-Science Stereotypes: A Meta-  
579 analysis of 5 Decades of U.S. Draw-A-Scientist Studies. *Child Dev.* (doi:10.1111/cdev.13039)
- 580 46. Prokop A, Illingworth S. 2016 Aiming for long-term, objective-driven science communication in the UK. *F1000Research*  
581 **5**, 1540. (doi:10.12688/f1000research.9079.1)
- 582 47. Poliakoff E, Webb TL. 2007 Scientists' Intentions to Participate in Public Engagement of Science Activities? *Sci. Commun.*  
583 **29**, 242–263. (doi:10.1177/1075547007308009)
- 584 48. Côté IM, Darling ES. 2018 Scientists on Twitter: Preaching to the choir or singing from the rooftops? *Facets* **3**, 682–694.  
585 (doi:10.1139/facets-2018-0002)
- 586 49. Carpenter S. 2010 A study of content diversity in online citizen journalism and online newspaper articles. *New Media Soc.*  
587 **12**, 1064–1084. (doi:10.1177/1461444809348772)
- 588 50. Maloney J. 2016 The Fastest-Growing Format in Publishing: Audiobooks. *Wall Str. J.* See  
589 <https://www.wsj.com/articles/the-fastest-growing-format-in-publishing-audiobooks-1469139910> (accessed on 24  
590 August 2018).

- 591 51. van Maas S. 2018 Opening the Audiobook. *Comp. Lit.* **70**, 337–356. (doi:10.1215/00104124-6991744)
- 592 52. In press. General Non-fiction Audio Books. *Audible*. See [https://www.audible.co.uk/cat/Non-fiction/Science-](https://www.audible.co.uk/cat/Non-fiction/Science-Audiobooks/536010031?ref=a_cat_Non-f_c1_subCat_14&pf_rd_p=c57d8418-2990-4e6e-92b3-7f42ebbd0566&pf_rd_r=M32C7VCC76AKHGNAG32X&)  
593 [Audiobooks/536010031?ref=a\\_cat\\_Non-f\\_c1\\_subCat\\_14&pf\\_rd\\_p=c57d8418-2990-4e6e-92b3-](https://www.audible.co.uk/cat/Non-fiction/Science-Audiobooks/536010031?ref=a_cat_Non-f_c1_subCat_14&pf_rd_p=c57d8418-2990-4e6e-92b3-7f42ebbd0566&pf_rd_r=M32C7VCC76AKHGNAG32X&)  
594 [7f42ebbd0566&pf\\_rd\\_r=M32C7VCC76AKHGNAG32X&](https://www.audible.co.uk/cat/Non-fiction/Science-Audiobooks/536010031?ref=a_cat_Non-f_c1_subCat_14&pf_rd_p=c57d8418-2990-4e6e-92b3-7f42ebbd0566&pf_rd_r=M32C7VCC76AKHGNAG32X&) (accessed on 24 August 2018).
- 595 53. BBC Radio 4. 2018 BBC Inside Science. *Pod. Show.* See  
596 <https://www.bbc.co.uk/programmes/b036f7w2/episodes/downloads> (accessed on 3 March 2018).
- 597 54. Gimlet Media. 2018 Science Vs. *Podcast*. See <https://www.gimletmedia.com/science-vs> (accessed on 3 March 2018).
- 598 55. 2018 Science Brunch. *Podcast*. See <http://www.sciencebrunch.org/> (accessed on 3 March 2018).
- 599 56. 2018 The Naked Scientists. *Podcast*. See <https://www.thenakedscientists.com/> (accessed on 3 March 2018).
- 600 57. 2018 This Week In Virology. *Podcast*. See <http://www.microbe.tv/twiv/> (accessed on 3 March 2018).
- 601 58. 2018 Exocast: The Exoplanet Podcast. *Podcast*. See <http://www.exocast.org/> (accessed on 3 March 2018).
- 602 59. 2018 The Black Goat: A Podcast About Doing Science. *Podcast*. See <http://www.theblackgoatpodcast.com/>.
- 603 60. News M, Southern California Public Radio. 2018 Brains On: A Podcast For Kids and Curious Adults. *Podcast*. See  
604 <https://www.brainson.org/> (accessed on 3 March 2018).
- 605 61. 2018 Tumble: A Science Podcast For Kids. *Podcast*. See <http://www.sciencepodcastforkids.com/> (accessed on 3 March  
606 2018).
- 607 62. 2018 The Show About Science. *Podcast*. See <http://theshowaboutscience.com/> (accessed on 3 March 2018).
- 608 63. University of California. 2018 University of California TV. *Podcast*. See <https://www.uctv.tv/ondemand/> (accessed on 3  
609 March 2018).
- 610 64. 2018 University of Wisconsin Sea Grant Institute: Podcasts. See <http://seagrant.wisc.edu/home/default.aspx?tabid=600>  
611 (accessed on 3 March 2018).
- 612 65. National Aeronautics and Space Administration (NASA). 2018 NASA Podcasts. *Podcast*. See  
613 <https://www.nasa.gov/podcasts> (accessed on 3 March 2018).
- 614 66. Centers for Disease Control and Prevention. 2018 Podcasts at CDC. *Podcast*. See <https://www2.cdc.gov/podcasts/>  
615 (accessed on 3 March 2018).
- 616 67. 2018 Science Podcasts: The American Chemical Society. See  
617 <https://www.acs.org/content/acs/en/pressroom/podcasts.html> (accessed on 3 March 2018).
- 618 68. 2018 The American Society for Microbiology: Podcasts. See <https://www.asm.org/index.php/podcasts> (accessed on 3  
619 March 2018).
- 620 69. 2018 The Institute of Physics. See <http://www.iop.org/> (accessed on 3 March 2018).
- 621 70. Nature Publishing Group. 2018 Nature Podcast. *Podcast*. See <https://www.nature.com/nature/podcast/index.html>  
622 (accessed on 3 March 2018).
- 623 71. PLOS. 2018 PLOScast. *Podcast*. See <http://blogs.plos.org/plospodcasts/> (accessed on 3 March 2018).
- 624 72. SAGE Publishing. 2018 Podcasts and Vodcasts. *Podcast*. See <https://uk.sagepub.com/en-gb/afr/podcasts> (accessed on 3  
625 March 2018).
- 626 73. 2018 BBC Radio 4 Podcasts. See <https://www.bbc.co.uk/podcasts/radio4> (accessed on 3 March 2018).
- 627 74. ABC Radio National. 2018 Podcasts and feeds: by program. See <http://www.abc.net.au/radionational/podcasts/program/>  
628 (accessed on 3 March 2018).
- 629 75. Scientific American. 2018 Podcasts. See <https://www.scientificamerican.com/podcasts/> (accessed on 3 March 2018).
- 630 76. National Public Radio (NPR). 2018 Podcasts. See <https://www.npr.org/podcasts/> (accessed on 3 March 2018).
- 631 77. 2018 Relay FM Podcast Network. See <https://www.relay.fm/> (accessed on 3 March 2018).
- 632 78. 2018 Star Talk Radio. *Podcast*. See <https://www.startalkradio.net/> (accessed on 3 March 2018).
- 633 79. Apple Inc. 2017 Apple Podcasts Identity Guidelines. See [https://www.apple.com/itunes/marketing-on-podcasts/identity-](https://www.apple.com/itunes/marketing-on-podcasts/identity-guidelines.html)  
634 [guidelines.html](https://www.apple.com/itunes/marketing-on-podcasts/identity-guidelines.html) (accessed on 3 March 2018).

635

636

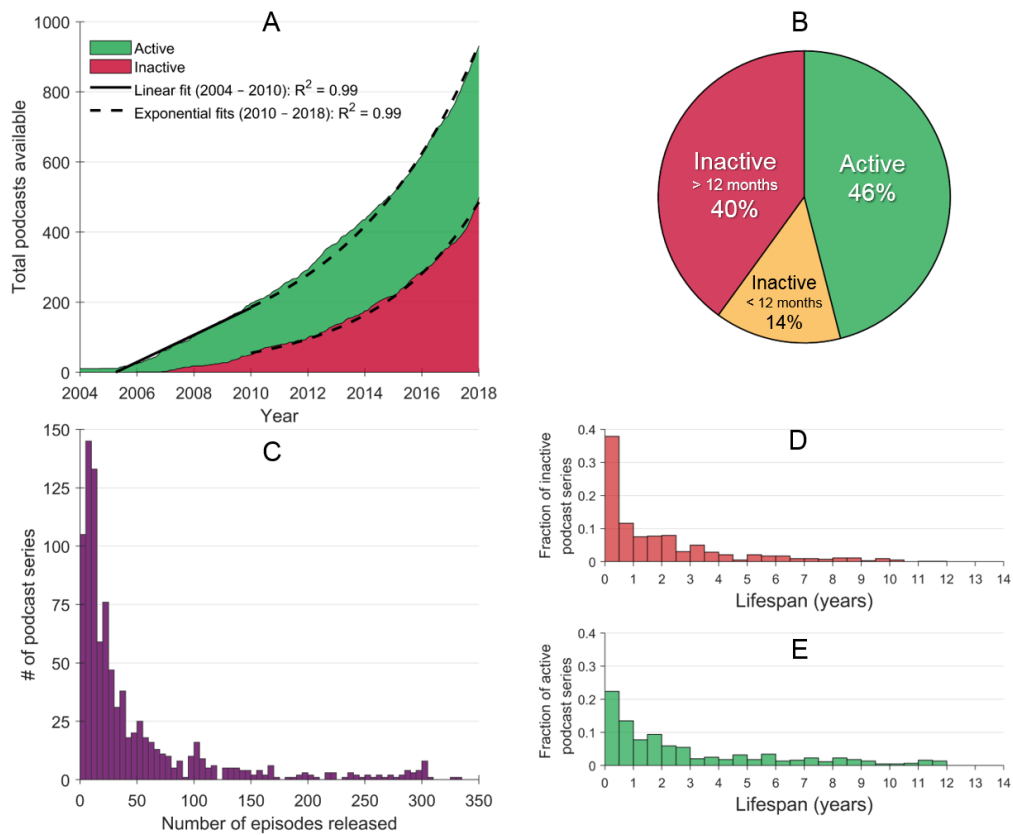

**Figure 1: The growth and lifespan of science podcasts. (A)** The total number of science podcasts shows linear growth between 2004 and 2010, followed by exponential growth to from 2010-2018 ( $n = 952$ ). **(B)** The proportion of active/inactive science podcast series during the sampling period, i.e. between 05/01/18 and 05/02/18. **(C)** The total number of episodes released by all podcast series (NB: x-axis is constrained to 350 episodes for clarity due to outliers). **(D)** The lifespan of inactive podcasts ( $n = 515$ ). **(E)** The lifespans of currently active podcasts ( $n = 437$ ).

637

638

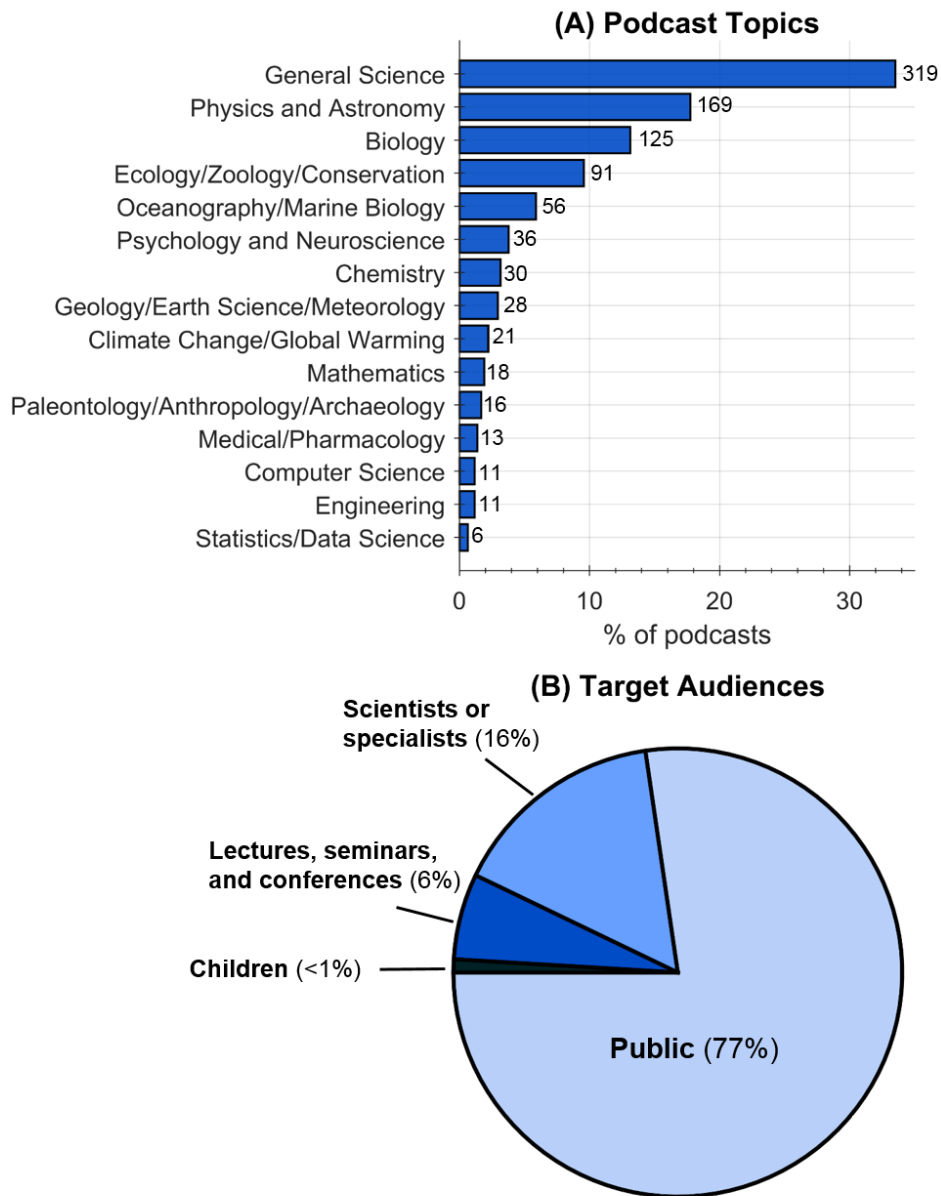

**Figure 2: What are the scope and aims of science podcasts?** (A) The proportion of science podcasts dedicated to various scientific topics. (B) The target audiences of science podcasts.

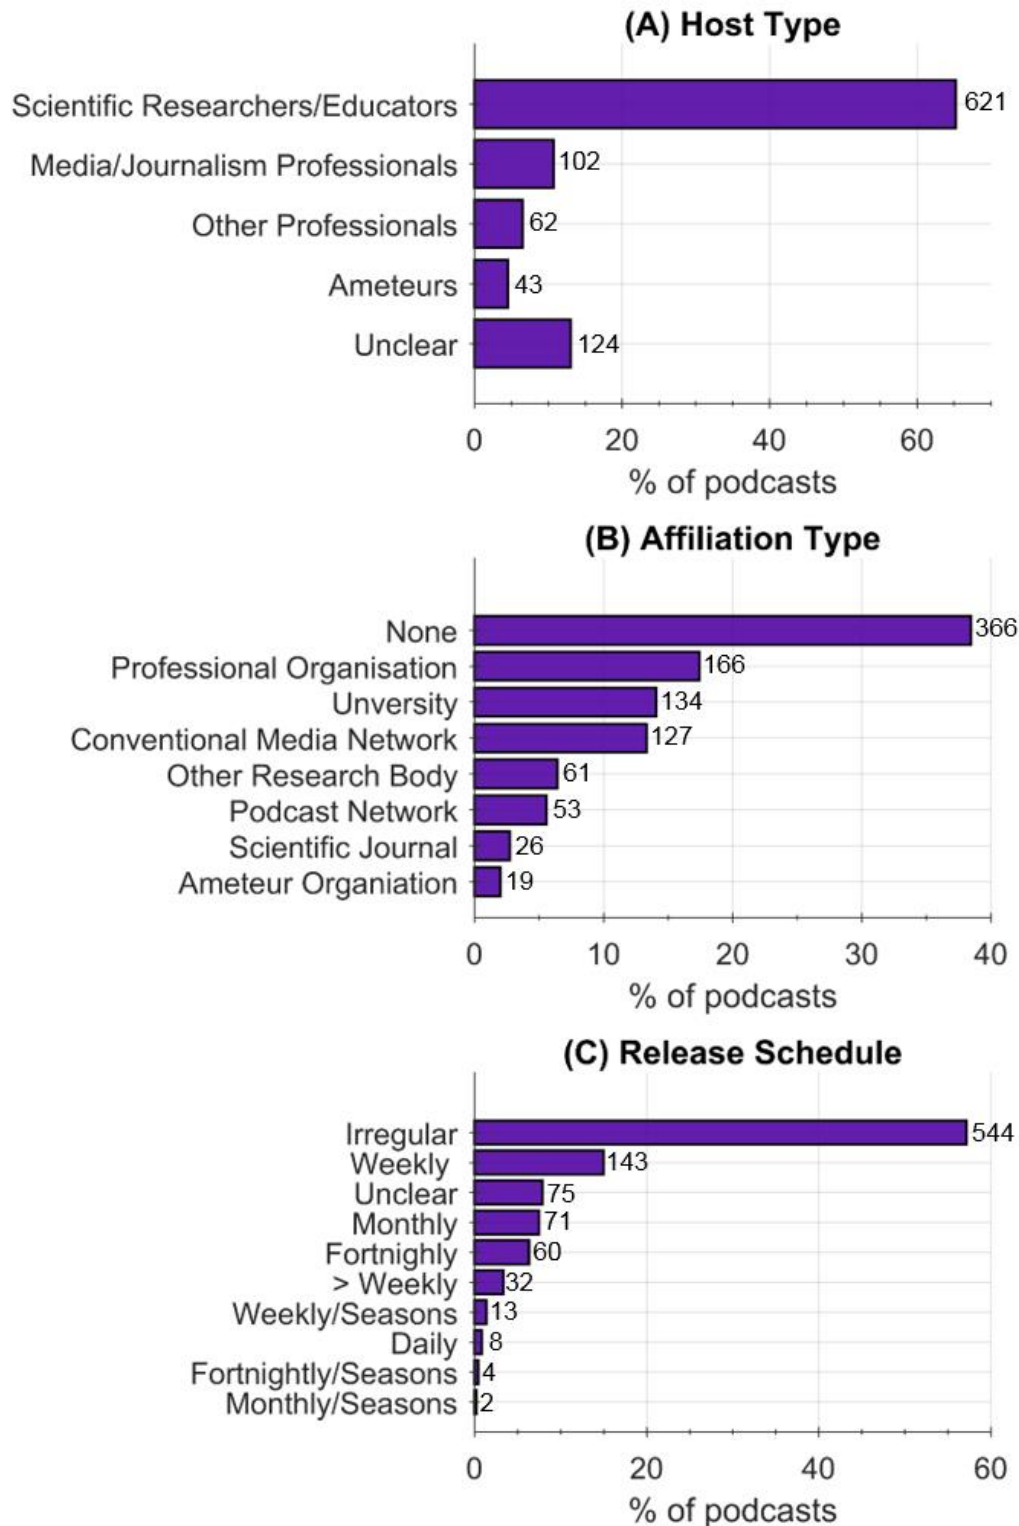

**Figure 3: Who produces science podcasts?** (A) The backgrounds of science podcast hosts. (B) The organisational affiliations of science podcasts. (C) The release schedule of science podcasts.



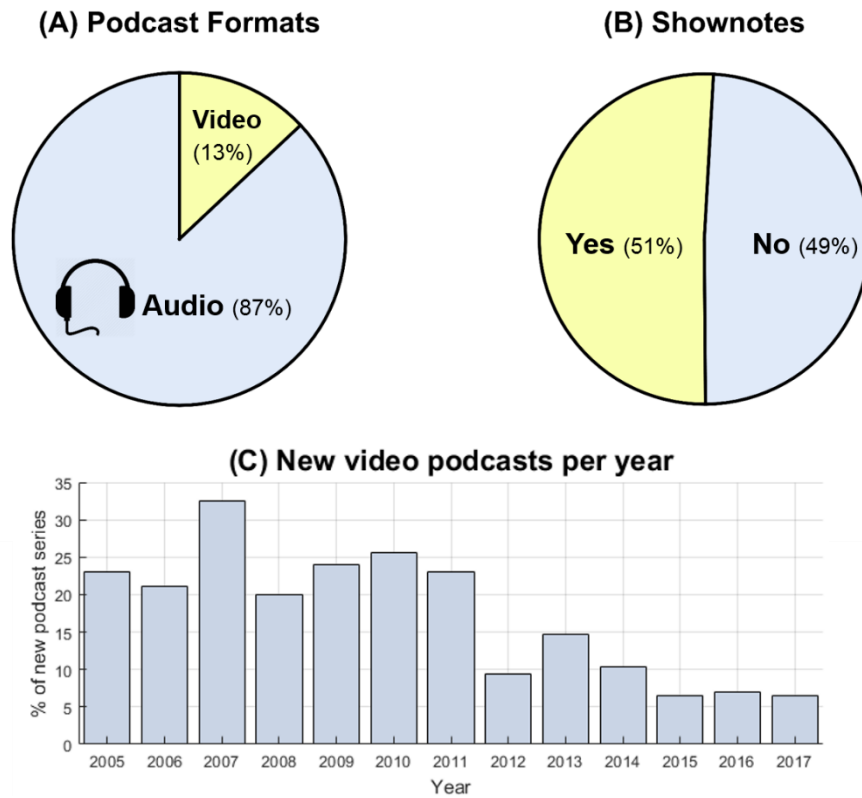

**Figure 4: non-audio media in science podcasts.** (A) The proportion of audio-only science podcasts compared to video format science podcasts. (B) The usage of show notes by science podcasts. (C) New video science podcasts produced each year as a proportion of the overall number of science podcasts produced each year. Long term declines in the number of video podcasts produced can be seen.

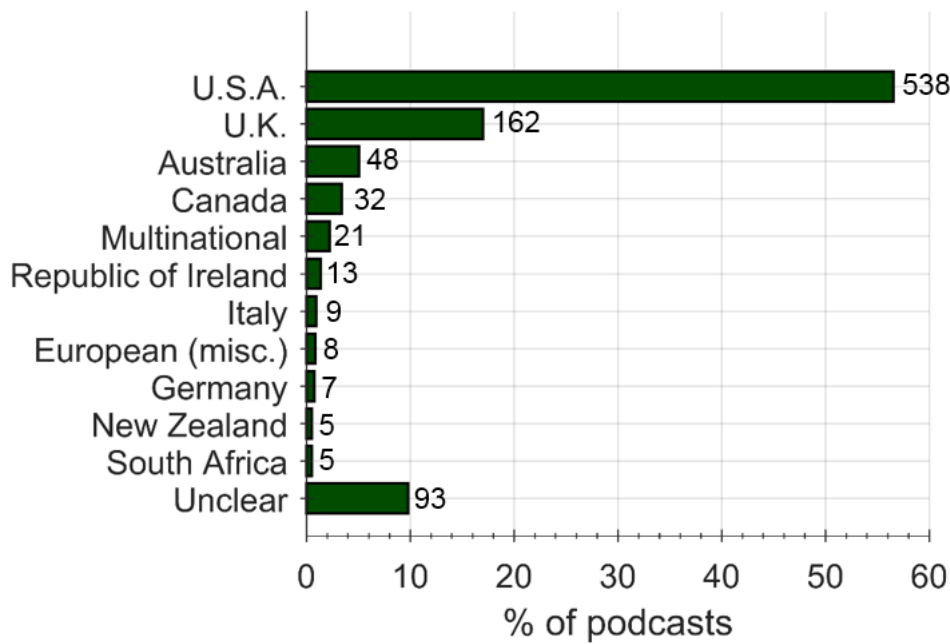

Figure 5: Production of English language science podcasts by country.

642

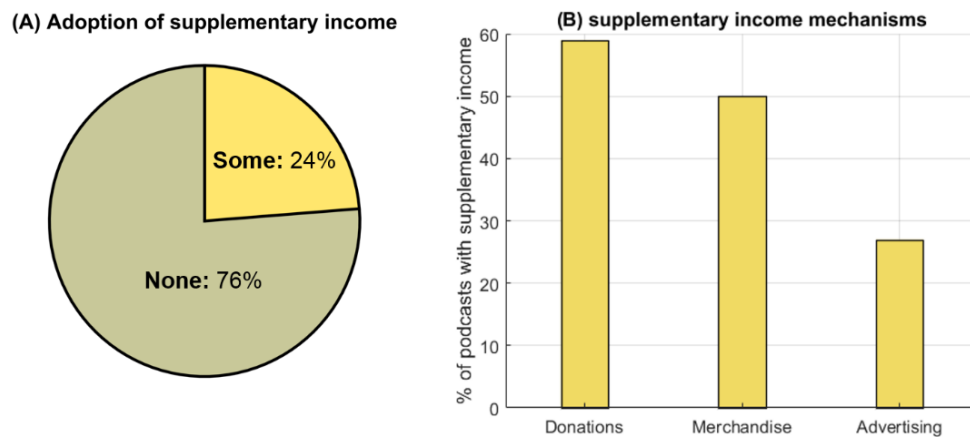

Figure 6: Do science podcasts generate overt supplementary income? (A) The proportion of podcasts with some supplementary income mechanism vs the proportion that have none. (B) The percentage of the subset of science podcasts with a supplementary income, that use each type of supplementary income mechanism. N.b. these categories are not mutually exclusive as some science podcasts utilise multiple income mechanisms.

643

644  
645

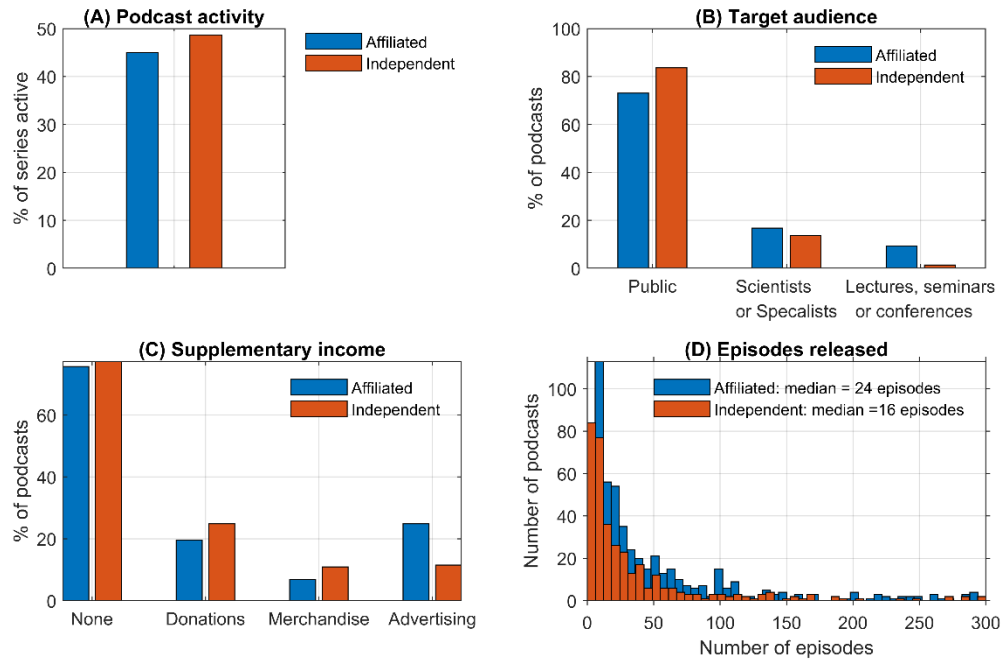

**Figure 7: Does science podcast affiliation alter production outcomes? (A)** Podcast affiliation vs. % of active podcasts. **(B)** Podcast affiliation vs. target audience. **(C)** Podcast affiliation vs. supplementary income mechanisms. **(D)** Podcast affiliation vs. total number of podcast episodes produced by podcast series, showing that affiliated podcasts produce a greater number of episodes (median = 24, average = 48) than independent podcasts (median 16, average = 90) ( $p < 0.01$ ).

646  
647  
648  
649  
650

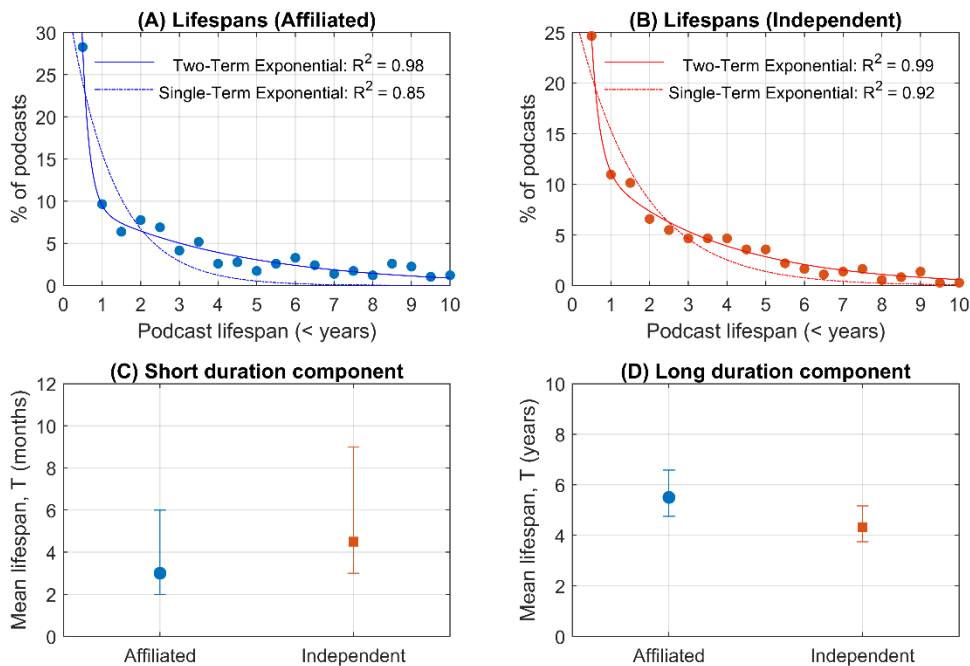

**Figure 8. Estimated mean lifespans of podcasts.** (A) two-term exponential fit to the lifespan of ‘*affiliated*’ podcasts. (B) Two-term exponential fit to the lifespan of ‘*independent*’ podcasts. (C) Mean lifespans of short-duration podcast estimated from the two-term exponential fits. Points represent the best-fit estimate and error bars represent 95% confidence intervals. The difference between best-estimate values is not statistically significant. (D) Mean lifespans of long-duration podcasts estimated. Points represent the best-fit estimate and error bars represent 95% confidence intervals. The difference between best-estimate values was statistically significant [ $p < 0.02$ ].

651

652

653

**Table 1.** The number of episodes released by science podcast series.

| Number of Episodes released | Number of Podcasts Qualifying | %    |
|-----------------------------|-------------------------------|------|
| 1 Episode                   | 25                            | 2.6  |
| ≤ 10 Episodes               | 250                           | 33.0 |
| ≤ 50 Episodes               | 685                           | 72.0 |
| ≤ 100 Episodes              | 802                           | 84.2 |
| ≤ 300 Episodes              | 913                           | 95.9 |
| > 300 Episodes              | 39                            | 4.1  |
| > 500 Episodes              | 17                            | 1.8  |
| > 1000 Episodes             | 5                             | 0.5  |

  

| Statistical Descriptor | Number of Episodes Released (entire population) |
|------------------------|-------------------------------------------------|
| Modal                  | 10                                              |
| Median                 | 20                                              |
| Mean                   | 73                                              |

654

**Table 2.** Categorical definitions used for classifying podcasts.

| Category                                      | Definition                                                                                                                                                                                                                                                                                                                 |
|-----------------------------------------------|----------------------------------------------------------------------------------------------------------------------------------------------------------------------------------------------------------------------------------------------------------------------------------------------------------------------------|
| <b><u>Podcast Activity</u></b> (see Figure 1) |                                                                                                                                                                                                                                                                                                                            |
| Episode                                       | A single instalment of a podcast, which may be downloaded or streamed.                                                                                                                                                                                                                                                     |
| Podcast series                                | A collection of podcast episodes released under the same podcast name/podcast feed.                                                                                                                                                                                                                                        |
| Active podcast series                         | A podcast series that has released at least one episode within the three months immediately prior to the sampling date.                                                                                                                                                                                                    |
| Inactive podcast series (< 1 year)            | A podcast series that has released at least one episode in the period between twelve and three months immediately prior to the sampling date.                                                                                                                                                                              |
| Inactive podcast series (> 1 year)            | A podcast series that has not released an episode in the twelve months immediately prior to the sampling date.                                                                                                                                                                                                             |
| Podcast lifespan                              | The time elapsed between the release dates of the first and last episode of a podcast. If podcast release date is not known (e.g. in the case of internet radio shows that have subsequently been released as podcasts), then this defaults to the original air date of the first episode available to stream or download. |
| Number of episodes                            | The total number of episodes freely available to the public to download or stream, either via 'iTunes' or another website.                                                                                                                                                                                                 |
| <b><u>Audiences</u></b> (see Figure 2)        |                                                                                                                                                                                                                                                                                                                            |
| Public                                        | The primary audience of this podcast are the general public, who are not assumed to have extensive scientific expertise or to be familiar with the topics covered. <i>Examples include 'BBC Inside Science',[53] 'Science Vs.',[54] 'Science Brunch',[55] and 'The Naked Scientists'.[56]</i>                              |
| Scientists or specialists                     | The primary audience of this podcast are scientists or specialists in fields related to science, who are assumed to have relevant specialist knowledge and specialist interests. <i>Examples include 'This Week in Virology',[57] 'ExoCast',[58] and 'The Black Goat'.[59]</i>                                             |
| Lectures, seminars, or conferences.           | This podcast is intended to deliver the contents of a scientific lecture, seminar, or conference presentation; i.e. it is intended to an audience listening to it for educational or professional learning purposes.                                                                                                       |
| Children                                      | The primary audience of this podcast is intended to be children. N.b. Age of children is not strictly defined in this study. <i>Examples include 'Brains On',[60] 'Wow in the World',[13] 'Tumble',[61] and 'The Show About Science'.[62]</i>                                                                              |
| <b><u>Hosts</u></b> (see Figure 3)            |                                                                                                                                                                                                                                                                                                                            |
| Scientific Researchers/Educators              | Podcast hosts whose occupation is/was primarily based on science research, science education, or science communication. [Rank 5]                                                                                                                                                                                           |
| Media/Journalism Professionals                | Podcast hosts whose occupation is/was primarily focused on producing conventional media, such as radio shows or newspaper articles. [Rank 4]                                                                                                                                                                               |

|                     |                                                                                                                                                                             |
|---------------------|-----------------------------------------------------------------------------------------------------------------------------------------------------------------------------|
| Other Professionals | Podcast hosts that have an acknowledged professional capacity that is not media production or scientific education/research. For example, comedians and musicians. [Rank 3] |
| Amateurs            | Podcast hosts that are hosting in an amateur capacity, for example as part of local astronomy or “sceptics” groups. [Rank 2]                                                |
| Unclear             | Host category could not be identified with available information. [Rank 1]                                                                                                  |

#### **Podcast Affiliations (see Figure 3, Figure 7, and Figure 8)**

|                           |                                                                                                                                                                                                                                                                                                                                                                            |
|---------------------------|----------------------------------------------------------------------------------------------------------------------------------------------------------------------------------------------------------------------------------------------------------------------------------------------------------------------------------------------------------------------------|
| Independent               | A podcast with no explicit or direct affiliation to any organisation. N.b. this does not include paid advertisements or sponsorships.                                                                                                                                                                                                                                      |
| Affiliated                | A podcast which explicitly acknowledges a direct affiliation to an organisation, as per one of the categories below.                                                                                                                                                                                                                                                       |
| University (and schools)  | A university which is directly involved in education and research. <i>Examples: ‘The University of California TV’,[63] and ‘The University of Wisconsin Sea Grant Institute’.[64]</i> N.b. For simplicity, secondary education institutions (e.g. high schools) are included within this category because they are not numerous enough to warrant separate categorisation. |
| Other Research Body       | A non-university organisation which conducts scientific research. <i>For example: ‘NASA’,[65] and the ‘Centres for Disease Control and Prevention’.[66]</i>                                                                                                                                                                                                                |
| Professional Organisation | A professional organisation or body that does not directly conduct scientific research. <i>For example: ‘The American Chemical Society’,[67] ‘The American Society for Microbiology’,[68] and ‘The Institute of Physics’.[69]</i>                                                                                                                                          |
| Scientific Journal        | An organisation that mainly produces peer-reviewed scientific journals. <i>For example: ‘Nature’,[70] ‘PLOS’,[71] and ‘SAGE’.[72]</i>                                                                                                                                                                                                                                      |
| Conventional Media Body   | An organisation which primarily disseminates conventional media, such as TV/radio broadcasts, or print media. <i>For example: ‘BBC Radio 4’,[73] ‘ABC Radio National’,[74] ‘Scientific American’,[75] and ‘NPR’.[76]</i>                                                                                                                                                   |
| Podcast Network           | An internet-only media organisation solely dedicated to releasing podcasts. <i>For example, ‘The Naked Scientists’,[56] ‘Relay FM’,[77] and ‘StarTalk Radio’.[78]</i>                                                                                                                                                                                                      |
| Amateur Organisation      | Any amateur organisation. For example, local astronomy groups and “sceptics” societies.                                                                                                                                                                                                                                                                                    |

#### **Podcast Media Types (see Figure 4)**

|               |                                                                                                                                                                                                                                                                                                                                |
|---------------|--------------------------------------------------------------------------------------------------------------------------------------------------------------------------------------------------------------------------------------------------------------------------------------------------------------------------------|
| Audio podcast | A podcast that directly incorporates only audio information [but not including media within show notes].                                                                                                                                                                                                                       |
| Video podcast | A podcast that directly incorporates both visual and audio information [but not including media within show notes].                                                                                                                                                                                                            |
| Show notes    | Media or information which is supplementary to a podcast episode and is available to the listener via podcast websites or podcast apps. Show notes may include images, videos, hyperlinks, scientific references, and audio transcripts. However, simple descriptions of a podcast episode are not classified as ‘show notes’. |

#### **Countries (see Figure 5)**

|                               |                                                                                                                                                                                        |
|-------------------------------|----------------------------------------------------------------------------------------------------------------------------------------------------------------------------------------|
| Country of podcast production | The country primarily associated with a podcast and its hosts. N.b. If a podcast is clearly associated with two or more countries, then that podcast is classified as “multinational”. |
|-------------------------------|----------------------------------------------------------------------------------------------------------------------------------------------------------------------------------------|

**Supplementary Income** (see Figure 6)

|                         |                                                                                                                                                                                                                                                                                                                                                                   |
|-------------------------|-------------------------------------------------------------------------------------------------------------------------------------------------------------------------------------------------------------------------------------------------------------------------------------------------------------------------------------------------------------------|
| Donations               | Requests for voluntary donations from listeners.                                                                                                                                                                                                                                                                                                                  |
| Merchandise             | Goods or services associated with the podcast which are sold to generate revenue.                                                                                                                                                                                                                                                                                 |
| Advertising/Sponsorship | Explicitly acknowledged sponsorship or advertisement from an organisation other than the organisation the podcast is directly affiliated with, including funding from research grants or charities. <i>N.b. Where podcasts are directly affiliated to advertiser-supported commercial radio, TV, or podcast networks, then advertising is assumed as default.</i> |

**Podcast Lifespans** (see Figure 1 and Figure 8)

|                          |                                                                                                                                                                                                                                                                                                               |
|--------------------------|---------------------------------------------------------------------------------------------------------------------------------------------------------------------------------------------------------------------------------------------------------------------------------------------------------------|
| Mean lifespan ( $\tau$ ) | The timespan in which 50% of a given population of podcasts will be become ‘inactive’. The mean lifespan is estimated by fitting an exponential decay to the lifespan data of a population of podcasts, and is therefore analogous to the concept of ‘mean lifetime’ within the context of radioactive decay. |
| Short lifespan podcasts  | The population of podcasts with a ‘mean lifespan’ of less than one year.                                                                                                                                                                                                                                      |
| Long lifespan podcasts   | The population of podcasts with a ‘mean lifespan’ of more than one year.                                                                                                                                                                                                                                      |

---

656

657
